# Supplementary material
Source: HighWire-hosted journal article supplement (https://pn.bmj.com/highwire/filestream/150546/field_highwire_adjunct_files/7/pn-2023-003708supp008_data_supplement.pdf)
Supplement: pn-2023-003708supp008_data_supplement.pdf [file pn-2023-003708supp008_data_supplement.pdf]

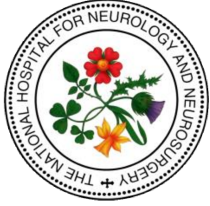

University College London Hospitals **NHS**  
NHS Foundation Trust

uclh

# Immunotherapy guidelines in neuromuscular diseases

Quick guide for Physicians

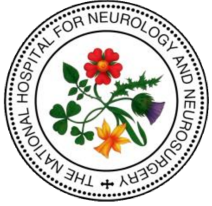

# General recommendations

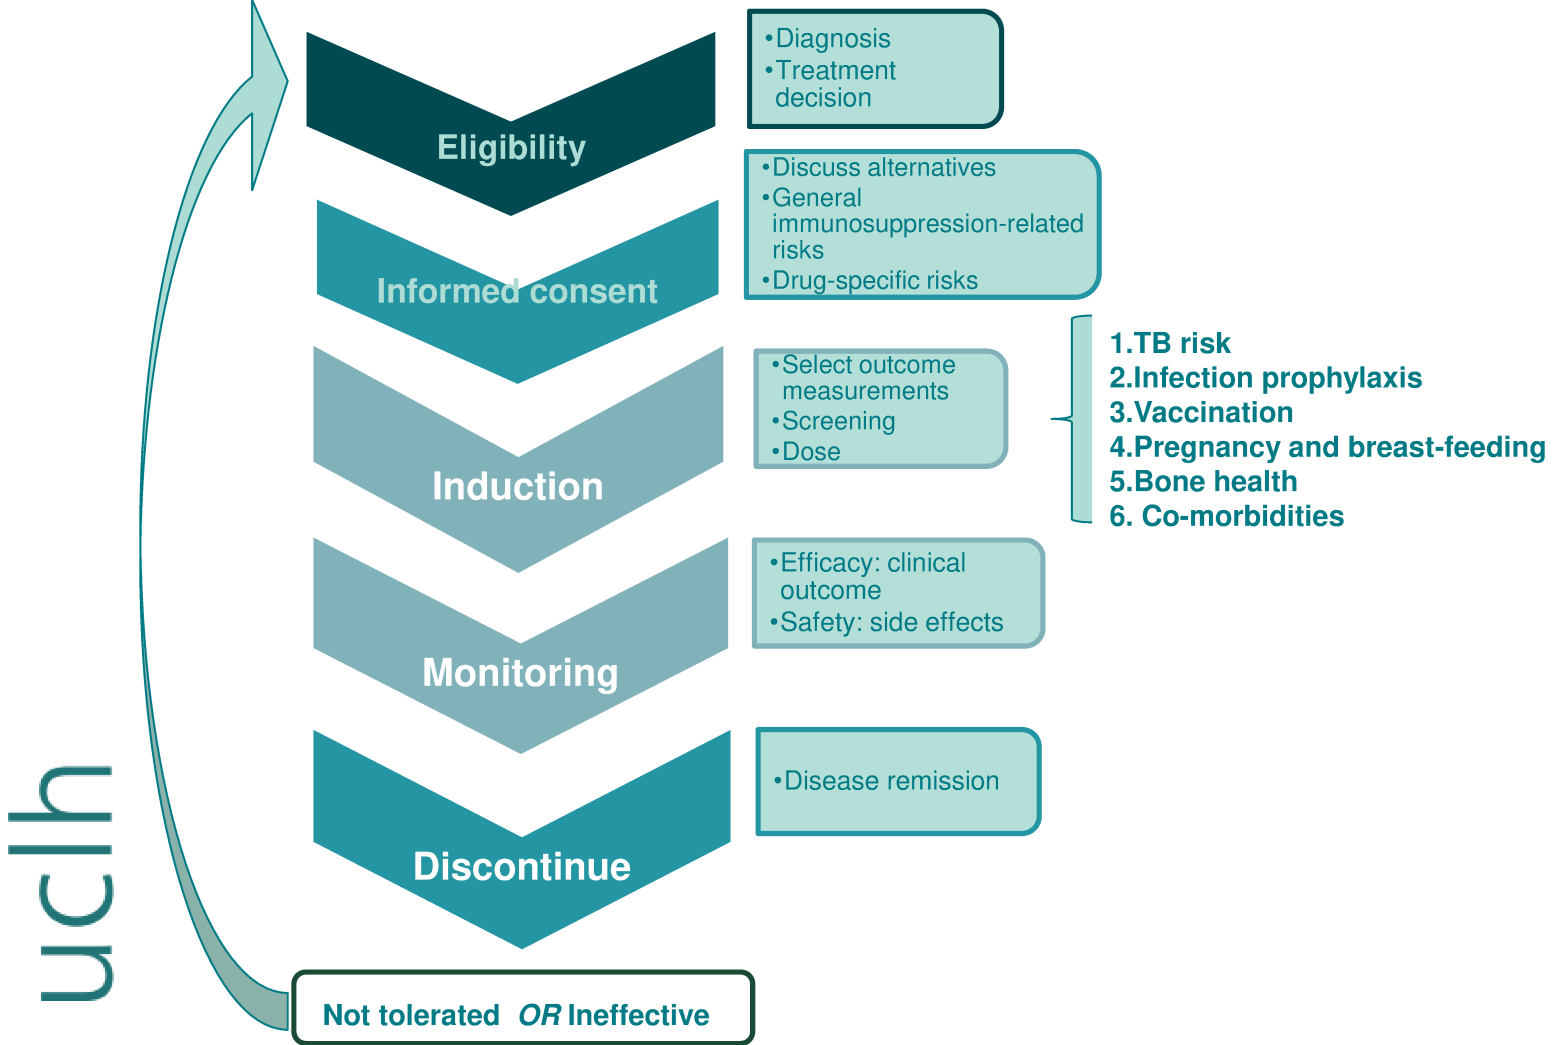

uclh

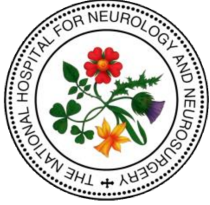

## Informed consent

\* Discussion of adverse events: [www.gmc-uk.org/guidance](http://www.gmc-uk.org/guidance)

|                                     |                                                                                                                                                                                                                                                                                |
|-------------------------------------|--------------------------------------------------------------------------------------------------------------------------------------------------------------------------------------------------------------------------------------------------------------------------------|
| 1.                                  | Inform patients of all potential minor adverse events if they occur frequently (1/10 – 1/100)                                                                                                                                                                                  |
| 2                                   | In form patient of any <b><u>serious adverse event</u></b> even if likelihood is very small (<1/10,000).                                                                                                                                                                       |
| <b><u>Serious adverse event</u></b> | An adverse outcome resulting in death, permanent or long-term physical disability or disfigurement, medium or long-term pain, or admission to hospital; or other outcomes with a long-term or permanent effect on a patient's employment, social or personal life (WHO, 1972). |

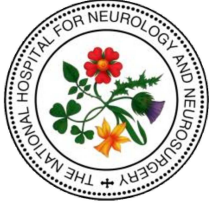

## TB Treatment

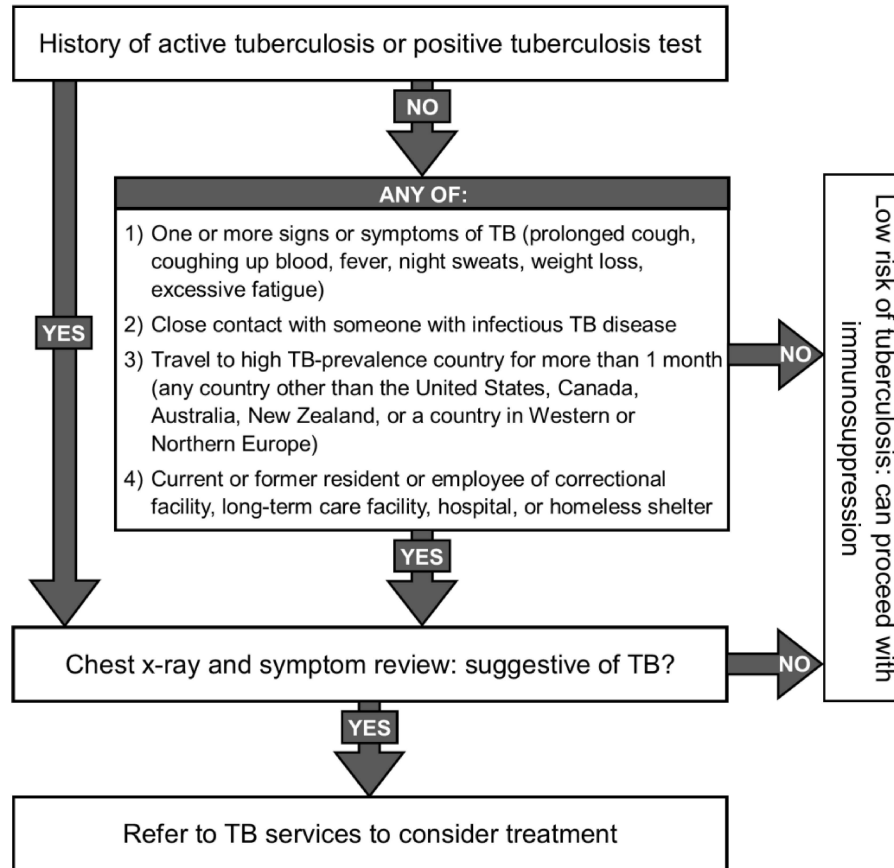

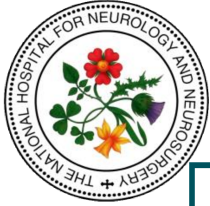

# PJP Prophylaxis

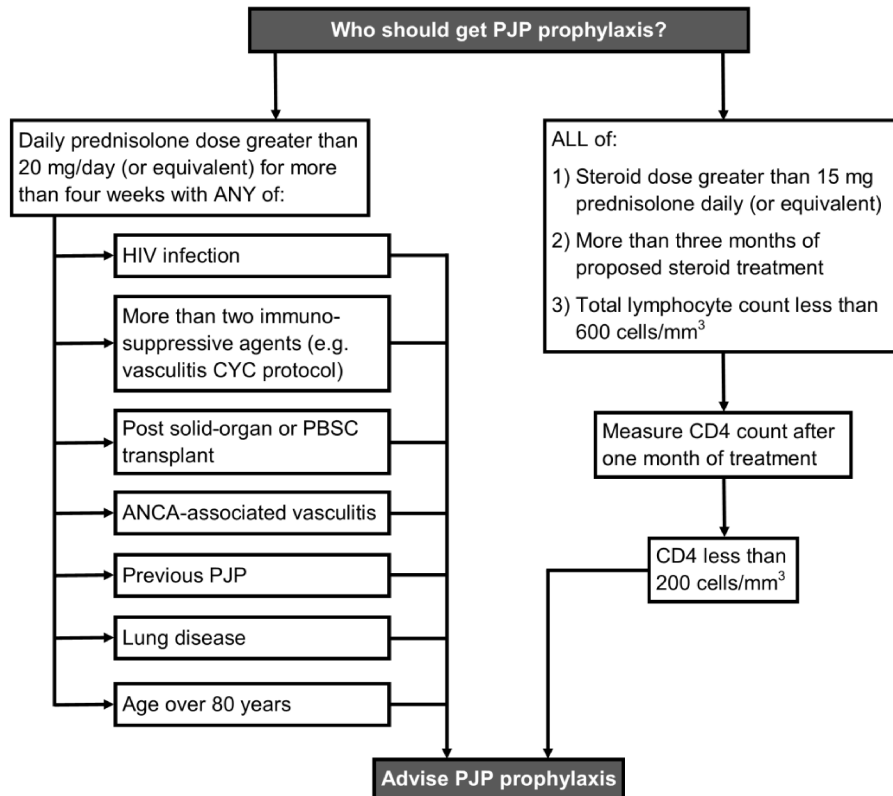

| Primary and Secondary PJP prophylaxis            |                                                                                                                                                                                                        |
|--------------------------------------------------|--------------------------------------------------------------------------------------------------------------------------------------------------------------------------------------------------------|
| <b>First line</b>                                | <b>Co-trimoxazole 960mg PO 3/week</b> <ul style="list-style-type: none"> <li>• 3/12x FBC, U&amp;E. Stop if or ↓ rash (480mg OD or 960mg alt. days).</li> <li>• 5% annual risk of SJS or TEN</li> </ul> |
| <i>Alternatives significantly less effective</i> | Dapsone 50-200mg PO OD AND pyrimethamine 75mg OD once weekly <i>OR</i> Pentamidine 300mg nebulised every 4 weeks <i>OR</i> Atovoquone 750mg PO BD                                                      |



## Reduction of infection risk

### Vaccination recommendations\*

- Pneumococcus
- Influenza (annual)
- Avoid live vaccines
- Varicella: check status, VZIg if exposed

### Peri-operative recommendations\*

- Minimise steroid dose pre-op
- Do not increase steroid dose peri-op to avoid adrenal insufficiency
- Do not routinely stop immunosuppressant pre-op (decision depends on procedure)

### Intercurrent infection recommendations\*

- Discontinue oral immunosuppressant (not steroids) until patient recovers from serious infection
- Postpone regular IVIg during infective symptoms to reduce clotting risk

**Procedures with high infection risk:**

**Discuss with microbiology team**

\*Ledingham J et al. *Rheumatology (Oxford)*. 2017 Jun 1;56(6):865-868.

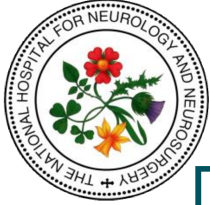

## Pregnancy and breastfeeding

|                  | Peri-conception                              | T1                                             | T2/T3                                          | Breast-feeding   | Paternal exposure |
|------------------|----------------------------------------------|------------------------------------------------|------------------------------------------------|------------------|-------------------|
| Prednisolone     | yes                                          | yes                                            | yes                                            | yes              | yes               |
| IVMP             | yes                                          | yes                                            | yes                                            | yes              | yes               |
| AZA              | yes                                          | yes                                            | yes                                            | yes              | yes               |
| MTX ≤25 mg /week | stop 1 month in advance                      | no                                             | no                                             | no               | yes               |
| MMF              | stop 6 weeks in advance                      | no                                             | no                                             | no               | yes               |
| CYC              | no                                           | no <sup>a</sup>                                | no <sup>a</sup>                                | no               | no                |
| IVIg             | yes                                          | yes                                            | yes                                            | yes              | yes <sup>b</sup>  |
| Rituximab        | consider stopping at conception <sup>c</sup> | severe disease if no alternatives <sup>c</sup> | severe disease if no alternatives <sup>d</sup> | yes <sup>b</sup> | yes <sup>b</sup>  |

<sup>a</sup> Only consider in severe life or organ-threatening maternal disease; <sup>b</sup> Limited data available; <sup>c</sup> can consider in severe maternal disease if no pregnancy-compatible alternatives available; <sup>d</sup> if used in third trimester, avoid live vaccinations in infant until six months of age; *Russell M et al. Rheumatology 2022*

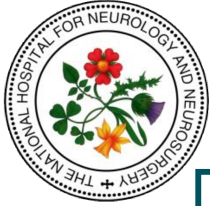

## Bone health

<https://www.nogg.org.uk, 2021>

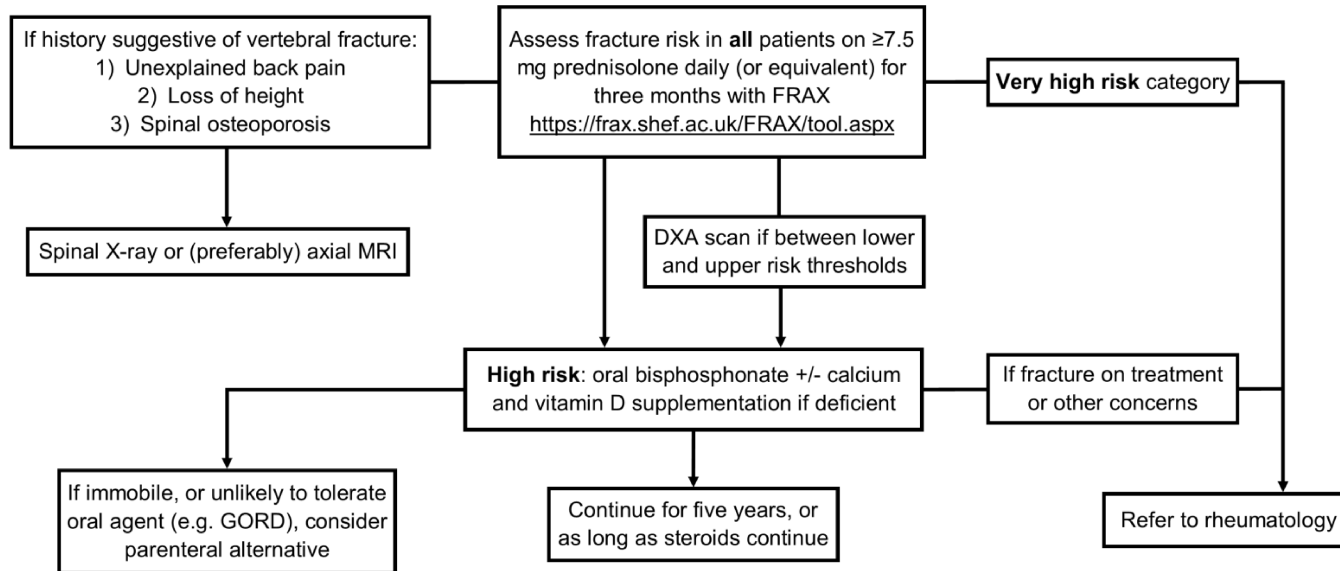

**Review** at 3 years zoledronic acid or 5 years oral bisphosphonate.

Longer treatment recommended if:

- age >75 years;
- history of hip or vertebral fracture;
- fracture while on treatment;
- oral glucocorticoids.

If bone protection discontinued:

- Reassess risk after new fracture, regardless of when this occurs;
- If no new fracture occurs, reassess risk at 18 months to 3 years.





## Screen for significant co-morbidities

| <b>Pre-treatment screening</b>                                                                                                                                   | <b>Height, weight, blood pressure and vascular risk assessment</b>                                                                                                                                               |
|------------------------------------------------------------------------------------------------------------------------------------------------------------------|------------------------------------------------------------------------------------------------------------------------------------------------------------------------------------------------------------------|
|                                                                                                                                                                  | <b>FBC, creatinine/calculated GFR, ALT and/or AST, albumin</b>                                                                                                                                                   |
|                                                                                                                                                                  | <b>Blood-borne viruses (HIV, HBV, HCV)</b>                                                                                                                                                                       |
|                                                                                                                                                                  | <b>History and examination for respiratory disease</b>                                                                                                                                                           |
| <b>Situation</b>                                                                                                                                                 | <b>Recommendation</b>                                                                                                                                                                                            |
| <b>Suspicion of parenchymal lung disease:</b> <i>Consider referral to respiratory physician</i><br><br>(Particularly important with MTX or cyclophosphamide use) | <ul style="list-style-type: none"> <li>Smoking cessation advice</li> <li>Lung function tests</li> <li>CXR +/- high resolution CT chest</li> </ul>                                                                |
| <b>HIV, HBV and HCV:</b>                                                                                                                                         | <ul style="list-style-type: none"> <li>Consider anti-viral treatment prior to immuno-suppression (discuss with specialist)</li> </ul>                                                                            |
| <b>Abnormal liver biochemistry:</b> <i>AST or ALT &gt; 100</i>                                                                                                   | <ul style="list-style-type: none"> <li><b>Not an absolute contraindication</b></li> <li>Select less hepatotoxic drug: MMF &gt; AZA</li> </ul>                                                                    |
| <b>Abnormal synthetic liver function:</b>                                                                                                                        | <ul style="list-style-type: none"> <li><b>Not an absolute contraindication</b></li> <li>Increased risk of toxicity: Except MMF</li> </ul>                                                                        |
| <b>Chronic renal impairment</b>                                                                                                                                  | <ul style="list-style-type: none"> <li>Increased toxicity and direct nephrotoxicity</li> <li>Investigate cause for newly identified CRI</li> <li>Alter dose/ frequency and monitoring (<i>Page 9</i>)</li> </ul> |
| <b>Cardiovascular risk</b>                                                                                                                                       | Primary prevention pre-treatment                                                                                                                                                                                 |
| <b>Previous malignancy</b>                                                                                                                                       | <b>Not an absolute contraindication;</b> routine population screening recommended                                                                                                                                |



## Dose adjustment in Chronic renal impairment

| Drug | Accumulates in CRI | Potential for nephrotoxicity | Chronic renal impairment                    |                 |                 |
|------|--------------------|------------------------------|---------------------------------------------|-----------------|-----------------|
|      |                    |                              | III                                         | IV              | V               |
|      |                    |                              | Recommended adjustment (% of standard dose) |                 |                 |
| AZA  | No                 | No                           | Normal                                      | 75-100%         | 50-100%         |
| MTX  | Yes                | Yes                          | 50%                                         | Contraindicated | Contraindicated |
| MMF  | Yes                | No                           | Normal dose                                 | 1mg BD max.     | 1mg BD max.     |
| CYC  | Yes                | Yes                          | According to age and creatinine (Page 14)   |                 |                 |



## Established outcome measures in NM disease

| Condition                                  | Established disability measure                   |
|--------------------------------------------|--------------------------------------------------|
| <b>CIDP</b>                                | MRC sum score                                    |
|                                            | CIDP-RODS*                                       |
|                                            | Dynamometer (kPa)**                              |
|                                            | 10m timed walk (seconds)                         |
|                                            | ONLS                                             |
| <b>Other neuropathy/<br/>neuromyotonia</b> | INCAT sensory sum score*                         |
|                                            | Berg balance scale*                              |
|                                            | ABC balance score *                              |
|                                            | Tremor scale*                                    |
|                                            | Myotonia behaviour scale*                        |
| <b>MMN</b>                                 | MRC sum score                                    |
|                                            | Dynamometer (kPa)**                              |
|                                            | MMN-RODS*                                        |
|                                            | ONLS                                             |
| <b>Inflammatory myopathy</b>               | MRC sum score                                    |
|                                            | Up and go 3 m walk (seconds)                     |
|                                            | CK                                               |
|                                            | HAQ score*                                       |
|                                            | Physician global activity assessment             |
|                                            | Patient/parent global activity assessment        |
|                                            | Manual muscle testing (MMT)                      |
|                                            | MDAAT                                            |
| <b>MG</b>                                  | MG composite*                                    |
|                                            | MG-ADL score                                     |
|                                            | Respiratory function, e.g. forced vital capacity |

\* Validated; \*\* Responsive

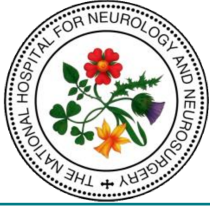

# Corticosteroids

## CONSENT

Common S/E

- Diabetes
- Gastritis
- ↑appetite
- ↑ weight
- Osteopenia
- Mood alteration
- Sleep disturbance
- Adrenal insufficiency
- Infections
- VZV reactivation/ infection risk
- Glaucoma/ cataract risk

Rare/ SAE:

- Avascular necrosis of femoral head (1:100-1:1000)

|          | INDUCTION                                 | MAINTENANCE                               | REDUCTION                    |
|----------|-------------------------------------------|-------------------------------------------|------------------------------|
| IVMP     | 1g/day x3 days<br>or<br>500mg/day x5 days | 1g / 1 day every 3 weeks x6**             | No down titration required** |
| PO Pred. | 1mg/kg/day<br>or<br>2mg/kg/alt days       | 1mg/kg/day PO Prednisolone<br>X 4-6 weeks | See WITHDRAWAL*              |

CO-PRESCRIBE: Bone protection (oral or IV bisphosphonate), D3 and calcium and PPI or H2-antagonist

| Cautions                                                                         | Drug interactions                                                                                                                                                                  | Contraindications                                                                    |
|----------------------------------------------------------------------------------|------------------------------------------------------------------------------------------------------------------------------------------------------------------------------------|--------------------------------------------------------------------------------------|
| Hepatic dysfunction<br>Diabetes<br>Hypertension<br>CCF<br>Recent MI<br>Pregnancy | Digoxin, Warfarin<br>NSAIDs<br>Carbamazepine, phenytoin, phenobarbital<br>Methotrexate<br>Bronchodilators, diuretics (K+)<br>Anti-retrovirals, macrolides, antifungals, rifampicin | Systemic infections<br>Psychosis, severe depression, BPAD<br>Wounds<br>Live vaccines |

## MONITORING

| When          | What                                                   |
|---------------|--------------------------------------------------------|
| Pre-treatment | BP, weight, HbA1C, TG, K, CXR, HIV                     |
|               | Signs of adrenal insufficiency                         |
|               | Assess fracture risk (Vit D and Ca <sup>2+</sup> )     |
|               | HIV, HBV, HCV.Document VZV status                      |
| Monitoring    | BP, weight, HbA1C, TG, K+ at one month, then 3 monthly |
|               | Glaucoma and cataract screening 6-12 monthly           |
|               | Signs of adrenal insufficiency                         |

## WITHDRAWAL\*

| Circumstance                                | Suggestion                                                                           |
|---------------------------------------------|--------------------------------------------------------------------------------------|
| Problem resolved and treatment<3 weeks      | ↓by 2.5 mg/ 3–4 days, to 7.5 mg per day, then ↓by 2.5 mg/ week, fortnight, or month. |
| disease resolution and/or treatment>1 month | ↓by 5mg month to 10 mg per day, then ↓by 1 mg/ month.                                |
| Abnormal bruising or severe sore throat     | Rapidly to 7.5mg/ day then ↓by 1 mg/ month.                                          |

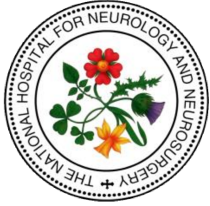

## Monitoring in ALL steroid-sparing agents

### CONSENT

Common S/E

- Nausea
- GI symptoms
- Infection risk
- Potential for hepatic and renal toxicity
- Potential for bone marrow failure
- Potential for teratogenicity

| When                  | What                                                                                         |
|-----------------------|----------------------------------------------------------------------------------------------|
| Pre-treatment         | FBC, U&E, eGFR, LFT, albumin, BhCG, HIV, HBV, HCV, EBV. Assess TB risk. Document VZV status. |
| Monitoring            | FBC, U&E, eGFR, LFT, albumin x 2 weeks until stable dose for at least 6weeks                 |
|                       | On stable dose: monthly FBC, U&E, LFT, albumin x3 months                                     |
|                       | Then 3 monthly FBC, U&E, LFT, albumin                                                        |
| Following dose change | FBC, U&E, eGFR, LFT, albumin x 2 weeks until stable dose for at least 6weeks                 |

### ACTIONABLE EVENTS

| Event                                             | Action                                                                                       |
|---------------------------------------------------|----------------------------------------------------------------------------------------------|
| WBC < 3.5 x10 <sup>9</sup> /L                     | Withhold until discussion with specialist team.                                              |
| Neutrophils < 1.6 x10 <sup>9</sup> /L             |                                                                                              |
| Unexplained eosinophilia >0.5 x10 <sup>9</sup> /L |                                                                                              |
| Platelets < 140 x10 <sup>9</sup> /L               |                                                                                              |
| Cr >30% above baseline or eGFR <60                |                                                                                              |
| AST, ALT > 100 units/L                            |                                                                                              |
| Unexplained fall in serum albumin                 |                                                                                              |
| Rash or oral ulceration                           | Check and treat B12, folate, TFT. If normal: Withhold until discussion with specialist team. |
| MCV > 105fL                                       |                                                                                              |
| Abnormal bruising or severe sore throat           | Withhold until FBP available and discuss with specialist team                                |

uclh

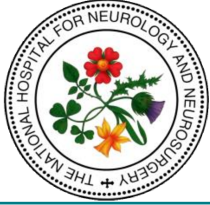

# Azathioprine

|                              |                    |                                                                              |                            |                      |
|------------------------------|--------------------|------------------------------------------------------------------------------|----------------------------|----------------------|
| <b>Starting dose</b>         | <b>1 mg/kg/day</b> | Increase at 4 weeks to 2mg/day and then as necessary                         | <b>Target dose</b>         | <b>2-3 mg/kg/day</b> |
| <b>Cautions</b>              |                    | <b>Drug interactions</b>                                                     | <b>Contraindications</b>   |                      |
| Non-melanoma skin cancer     |                    | <b>Allopurinol, aminosalicylates , Co-trimoxazole, trimethoprim (Severe)</b> | Homozygous TMPT deficiency |                      |
| Pancreatitis                 |                    | Warfarin                                                                     | Live vaccine               |                      |
| TB, Hepatitis B and C        |                    | ACE-inhibitors                                                               | Lesch-Nyhan syndrome       |                      |
| Heterozygous TMPT deficiency |                    | Phenytoin, carbamazepine, sodium valproate                                   |                            |                      |

## CONSENT

### Common S/E

- GI disturbance
- Hepatic and renal dysfunction
- Dose related bone marrow suppression
- Skin: fungal infection/ reactivation and BCC
- Infections
- VZV reactivation

### Rare/ SAE:

- Hepatic veno-occlusive disease
- Pure red cell aplasia
- pancreatitis

## SPECIFIC MONITORING

| When          | What                                                                                                |
|---------------|-----------------------------------------------------------------------------------------------------|
| Pre-treatment | TMPT                                                                                                |
| Monitoring    | As per All steroid sparing agents<br>Except if TMPT low metaboliser:<br>at least monthly monitoring |



# Methotrexate

## CONSENT

### Common S/E

- GI disturbance
- Skin, nail and hair changes
- Hepatic and renal dysfunction
- Dose related bone marrow suppression
- Infection: VZV reactivation

### Rare/ SAE:

- Pneumonitis
- Hypersensitivity/ SJS

|                                                                   |                     |                                     |             |                         |
|-------------------------------------------------------------------|---------------------|-------------------------------------|-------------|-------------------------|
| Starting dose                                                     | <b>5-10 mg/week</b> | Increase by 2.5-5mg every 2-6 weeks | Target dose | <b>7.5-25 mg/weekly</b> |
| CO-PRESCRIBE WITH 5mg FOLIC ACID PER WEEK on ALTERNATE DAY TO MTX |                     |                                     |             |                         |

| Cautions                                    | Drug interactions                              | Contraindications                                     |
|---------------------------------------------|------------------------------------------------|-------------------------------------------------------|
| Renal impairment                            | Phenytoin (↑anti-folate effect)                | Suspected infection                                   |
| TB, Hepatitis B and C                       | Probenecid, NSAIDs, Penicillin (↓excretion)    | Pregnancy and breast feeding                          |
| Anaemia, cytopenia with bone marrow failure | Co-trimoxazole, trimethoprim (↑marrow failure) | Bone marrow failure or unexplained anaemia/ cytopenia |
|                                             | Tolbutamide (↑MTX concentration)               |                                                       |

## SPECIFIC MONITORING

| When          | What       |
|---------------|------------|
| Pre-treatment | CXR        |
| Monitoring    | Annual CXR |



# Mycophenolate mofetil

## CONSENT

### Common S/E

- GI disturbance
- Hepatic and renal dysfunction
- Dose related bone marrow suppression
- Skin: fungal infection/ reactivation and BCC
- Infections
- VZV reactivation

### Rare/ SAE:

- PML (with concomitant immunosuppressant)

|               |                  |                                                                     |             |                     |
|---------------|------------------|---------------------------------------------------------------------|-------------|---------------------|
| Starting dose | <b>500mg/day</b> | Then 500mg BD, increase by 500mg per week to efficacy/ as tolerated | Target dose | <b>Max.: 3g/day</b> |
|---------------|------------------|---------------------------------------------------------------------|-------------|---------------------|

| Beware                                                                                      | Drug-interactions                        | Contraindications                |
|---------------------------------------------------------------------------------------------|------------------------------------------|----------------------------------|
| Malignancy: B-cell lymphoma associated with EBV (↑azathioprine, tacrolimus and ciclosporin) | Antacids (↓bioavailability)              | Pregnancy and breast feeding     |
| Lymphoproliferative disease or unexplained anaemia, thrombocytopenia or neutropenia         | Cholestyramine (↓bioavailability)        | Localised and systemic infection |
| Gastrointestinal disturbance                                                                | Probenecid (↑concentration)              |                                  |
| Urogenital irritation/ infection                                                            | Aciclovir (↑concentration of both drugs) |                                  |
| Bone marrow failure: bruising and sore throat. (Severe sepsis in 0.5%)                      |                                          |                                  |



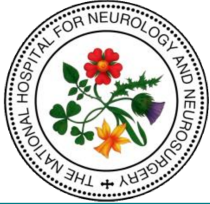

# Rituximab

## CONSENT

### Common AE

- Infusion reaction
- Bone marrow suppression
- Infection
- Mild hypersensitivity reactions
- SLE-like syndrome

### Rare/ SAE:

- PML (with concomitant immunosuppressant)
- Hypogammaglobulinaemia (with repeat treatments)
- Severe skin reaction: SJS\*, TEN\*\*

| Dose                                                                                | 1g IVI x2 (2 weeks apart)                                                                                                                                  | Further 1g IVI at 4 weeks post second dose if no CD19 depletion |                                                                                                       |
|-------------------------------------------------------------------------------------|------------------------------------------------------------------------------------------------------------------------------------------------------------|-----------------------------------------------------------------|-------------------------------------------------------------------------------------------------------|
| REQUIRED PRE-MEDICATIONS: 100 mg IVMP + 10 mg IV chlorphenamine + 1g PO paracetamol |                                                                                                                                                            |                                                                 |                                                                                                       |
| Adverse events                                                                      | Incidence                                                                                                                                                  | Contraindications                                               |                                                                                                       |
| Infusion reactions                                                                  | 25% during first infusion; usually mild to moderate in severity; reduced incidence on subsequent infusions                                                 | Hypersensitivity to Rituximab or other murine proteins          |                                                                                                       |
| Hypogammaglobulinaemia                                                              | Low serum IgM (22.4%), IgG (3.5%), or IgA (1.1%) levels for more than 4 months; serious infections more common in those with low IgG levels                | Severe heart failure                                            |                                                                                                       |
| Serious infection                                                                   | 3.94/100 patient-years (as per MTX in RCT); infection rate static over 5 years of treatment; serious opportunistic infection rare (0.06/100 patient-years) | Active infection                                                |                                                                                                       |
|                                                                                     | Zoster reactivation: 9/1,000 patient-years (as per MTX)                                                                                                    | <i>Pregnancy/ breastfeeding</i>                                 |                                                                                                       |
|                                                                                     | TB: 2/3,194 cases (0.06%)                                                                                                                                  |                                                                 |                                                                                                       |
|                                                                                     | PML: Rare (2.3/100,000 patient-years)                                                                                                                      |                                                                 |                                                                                                       |
| Pre-treatment assessment                                                            | FBC, CD19, U&E, LFTs, HIV, HBV, HCV, HBs Ag, anti-HbcIgG, Ig, BhCG. VZV, TB screening (Vaccination recommended >4 weeks prior to treatment)                | Event                                                           | Action                                                                                                |
| <b>Monitoring</b>                                                                   | Ig x6monthly                                                                                                                                               | HBsAg -ve anti-HBc IgG+ve                                       | Check HBV DNA titre: if undetectable monitor: if ↑ with treatment refer to hepatology for anti-virals |
|                                                                                     | C19 x4 weeks-4 months post-dose to check response                                                                                                          | HBsAg -ve anti-HBc IgG -ve                                      | Pre-treatment vaccination                                                                             |
|                                                                                     |                                                                                                                                                            | HBsAg +ve and/or anti-HBc IgG +ve                               | Pre-treatment prophylaxis (consider alternative to Rituximab/ with hepatology)                        |
|                                                                                     |                                                                                                                                                            | HCV +ve                                                         | Discuss with hepatology                                                                               |

\*SJS: Stevens Johnson syndrome

\*\*TEN: Toxic epidermal necrolysis

uclh



# CYCLOPHOSPHAMIDE

| CONSENT: Adverse reactions | PREVENTION                                                                                                                                                                                                                                                                                                                                                |
|----------------------------|-----------------------------------------------------------------------------------------------------------------------------------------------------------------------------------------------------------------------------------------------------------------------------------------------------------------------------------------------------------|
| Bladder toxicity           | 1L prehydration with normal saline or orally over 1 hour prior to pulsed cyclophosphamide<br>3L/day oral fluid intake for 3 days<br>Mesna 200mg IV in 100ml sodium chloride 0.9% infusion over 30 minutes before pulsed cyclophosphamide<br>Mesna 400mg PO stat at 2 hours post- cyclophosphamide<br>Mesna 400mg PO stat at 6 hours post cyclophosphamide |
| PJP                        | Co-trimoxazole 480mg three times per week (care with allergy)                                                                                                                                                                                                                                                                                             |
| GI disturbance             | Cyclizine 50mg slow IV bolus or ondansetron 8mg slow IV bolus 15 minutes before pulsed cyclophosphamide<br>Domperidone 10-20mg PO TDS for 3-5 days                                                                                                                                                                                                        |
| CIN                        | Annual smear x3years<br>Follow up as per national guidelines                                                                                                                                                                                                                                                                                              |
| Vaccination                | Influenza/ pneumococcus (if possible)<br>Avoid live vaccination                                                                                                                                                                                                                                                                                           |
| Fungal infection           | Consider prophylaxis                                                                                                                                                                                                                                                                                                                                      |
| Staph. Aureus              | Consider treatment in Wegner's granulomatosis                                                                                                                                                                                                                                                                                                             |
| Infertility                | Counsel; consider cryopreservation if clinically permitted                                                                                                                                                                                                                                                                                                |
| Osteoporosis               | Bisphosphonate + calcium + vit. D (given co-prescription of corticosteroids)                                                                                                                                                                                                                                                                              |
| TB                         | Risk assessment                                                                                                                                                                                                                                                                                                                                           |
| HBV, HCV, HIV, VZV         | Screen pre-treatment. Treat if indication (specialist discussion)                                                                                                                                                                                                                                                                                         |



# CYCLOPHOSPHAMIDE

## Prednisolone\*:

- 60mg OD x1week
- 45mg OD x1week
- 30mg OD x1week
- 20mg OD x2weeks
- 15mg OD x2weeks
- 12.5mg OD x4weeks
- 10mg OD x8weeks
- 7.5mg OD x6months
- 5mg OD x3-6months

+/-12.5% in first 2 months

+/-25% after that

## Induction

### •Cyclophosphamide

- 15mg/kg x10 cycles (Max: 1.5g)
- Titrate to age/GFR/WCC
  - AND**
- Oral prednisolone\*
  - OR**
- IVMP/ PLEX (life threatening or organ threatening disease)

## Remission

- Taper steroids as per CYCLOPS regimen\*
- Commence maintenance therapy as appropriate 3 weeks following end of cyclo
  - Azathioprine
  - Methotrexate
  - Mycophenolate mofetil

## Maintenance

- Taper at 2years if clinically stable

Dosing in obese patients: use ABW25, using the equation  $IBW + 0.25 \times (TBW - IBW)$

| Age (years) | Creatinine 150-300 mol/L | Creatinine 300-500 mol/L | Pre-dose FBC:                                                                                                                                             |                                                                                                 |
|-------------|--------------------------|--------------------------|-----------------------------------------------------------------------------------------------------------------------------------------------------------|-------------------------------------------------------------------------------------------------|
| <60         | 15 mg/kg/pulse           | 12.5 mg/kg/pulse         | WBC < 4 x10 <sup>9</sup> /L or NE < 2 x10 <sup>9</sup> /L prior to dose                                                                                   | Postpone dose and check weekly until WBC > 4 x10 <sup>9</sup> /L and NE > 2 x10 <sup>9</sup> /L |
| >60 and <70 | 12.5 mg/kg/pulse         | 10 mg/kg/pulse           | <b>After pulse 1 monitor FBC on day 7, 10 and 14:<br/>After each dose change monitor FBC on day 10:</b>                                                   |                                                                                                 |
| >70         | 10 mg/kg/pulse           | 7.5 mg/kg/pulse          | If Leucocyte nadir 1-2 x10 <sup>9</sup> /L or neutrophil nadir 0.5-1.0 x10 <sup>9</sup> /L (after 1 <sup>st</sup> 2 doses or at day 10 after dose change) | Reduce pulse by 40% of previous dose                                                            |
|             |                          |                          | If Leucocyte nadir 2-3 x10 <sup>9</sup> /L or neutrophil nadir 1.0-1.5 x10 <sup>9</sup> /L (after 1 <sup>st</sup> 2 doses or at day 10 after dose change) | Reduce pulse by 20% of previous dose                                                            |

## Monitoring:

|                |                                                                                                                            |
|----------------|----------------------------------------------------------------------------------------------------------------------------|
| FBC            | As above                                                                                                                   |
| Cr clearance   | Pre-dose                                                                                                                   |
| Urinalysis     | 3 monthly. x1 year / 6 monthly x2-5 years. If haematuria: MSSU ;,if no infection: cystoscopy<br>Annual cytology: on going. |
| Clinical       | Monthly x 3/12; then 3-6 months x1yr; then 6-12 monthly x2-5 year                                                          |
| Cervical smear | Annually for first 3 years, then according to national guidelines                                                          |

\* De Groot et al. Ann Intern Med. 2009 May 19;150(10):670-80.

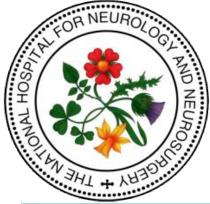

# IV Immunoglobulin

Calculate ideal body weight (IBW) (kg):  
 IBW for males =  $50 + [2.3 \times (\text{height in inches} - 60)]$   
 IBW for female =  $45.5 + [2.3 \times (\text{height in inches} - 60)]$

Calculate dose-determining weight (DDW) (kg):  
 $DDW = IBW + 0.4 [\text{actual body weight (kg)} - IBW]$

Use DDW for calculating the IVIg dose required

| Induction                                                                                                                                                                                                                                                                                                                         | Starting dose                                                                                                                                     |                                                                                  |
|-----------------------------------------------------------------------------------------------------------------------------------------------------------------------------------------------------------------------------------------------------------------------------------------------------------------------------------|---------------------------------------------------------------------------------------------------------------------------------------------------|----------------------------------------------------------------------------------|
| 2 doses of IVIg<br>4-6 weeks apart                                                                                                                                                                                                                                                                                                | Dose: 2g/kg (1 mg/kg in myasthenia)<br>If BMI $\geq 30$ kg/m <sup>2</sup> or if actual weight $>20\%$ more than IBW, consider adjusted-bodyweight | Rate :0.4g/kg/day over 5 days<br>Max. rate: 100ml/hr<br>Max. volume: 1 mg/kg/day |
| MAINTENANCE: SEE ALGORITHM                                                                                                                                                                                                                                                                                                        |                                                                                                                                                   |                                                                                  |
| Consent/ Adverse reactions                                                                                                                                                                                                                                                                                                        |                                                                                                                                                   |                                                                                  |
| 10-15%:infusion related headaches, higher risk in migraineurs (Can be managed with pre-medication, rate and dose reduction/ dose fractionation and migraine prophylaxis)                                                                                                                                                          |                                                                                                                                                   |                                                                                  |
| Elevated thromboembolic risk: Hold IVIg during active infection. Review procoagulant medication, risk of hyperviscosity, DVT risk. $\uparrow$ TEE risk by 50%/year if IVIg and HTN and T2DM; $\uparrow 53\%/yr$ if IVIg and T2DM; $\uparrow 15\%/yr$ if IVIg and HTN:<br><b>Proactively manage HTN and T2DM in IVIg patients.</b> |                                                                                                                                                   |                                                                                  |
| Anaphylaxis/ transmission of infective agent : very rare ( $>1:10,000$ ).                                                                                                                                                                                                                                                         |                                                                                                                                                   |                                                                                  |
| Haemolytic anaemia: Very rare ( $>1:100,000$ infusions). Lymphopenia/ thrombocytopenia: transient / rarely clinically significant.<br>Check FBC IF clinically indicated (not routinely)                                                                                                                                           |                                                                                                                                                   |                                                                                  |

## MONITORING

| Pre-treatment assessment                       | Hepatitis screen , HIV, IgA<br>FBC, U&E, PPE, immunofixation<br>Consider testing Ig levels, plasma viscosity                                                                                                                       |
|------------------------------------------------|------------------------------------------------------------------------------------------------------------------------------------------------------------------------------------------------------------------------------------|
| Before each infusion                           | Blood pressure, oxygen saturation, pulse, respiratory rate and temperature<br>Check FBC (differential), urea and electrolytes <b>ONLY if clinically indicated</b><br>Review for evidence of infection<br>Check for evidence of VTE |
| Annual clinical assessment (consultant or CNS) | Pre and post-treatment assessment using at least 3 validated disability measures                                                                                                                                                   |

## ACTIONS

| Event                           | Action                                                                                                                                                                                    |
|---------------------------------|-------------------------------------------------------------------------------------------------------------------------------------------------------------------------------------------|
| Mild infusion related reactions | Slow or stop infusion. Give paracetamol for fever/headaches. Restart infusion as per protocol when symptoms have resolved. If symptoms persist, stop the infusion and seek medical advice |
| MODERATE/ SEVERE reaction       | Stop infusion. Call for medical help. If necessary, administer supportive drugs: Hydrocortisone iv, Chlorphenamine iv, Salbutamol.<br>Anaphylaxis/Crash box should be available           |
| IgM / IgG paraprotein           | Consider possibility of mixed cryoglobulinaemia. Seek immunological advice<br>Consider measuring serum viscosity                                                                          |
| Serum viscosity $> 3$ mPas      | Exercise caution; use slower rate of infusion and lower dose. Before and after infusion check viscosity.                                                                                  |

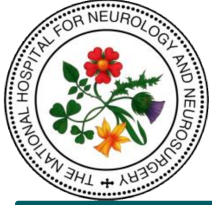

# IVIg dosing algorithm

**\* At least 3 pre-set, individualised outcome measures**

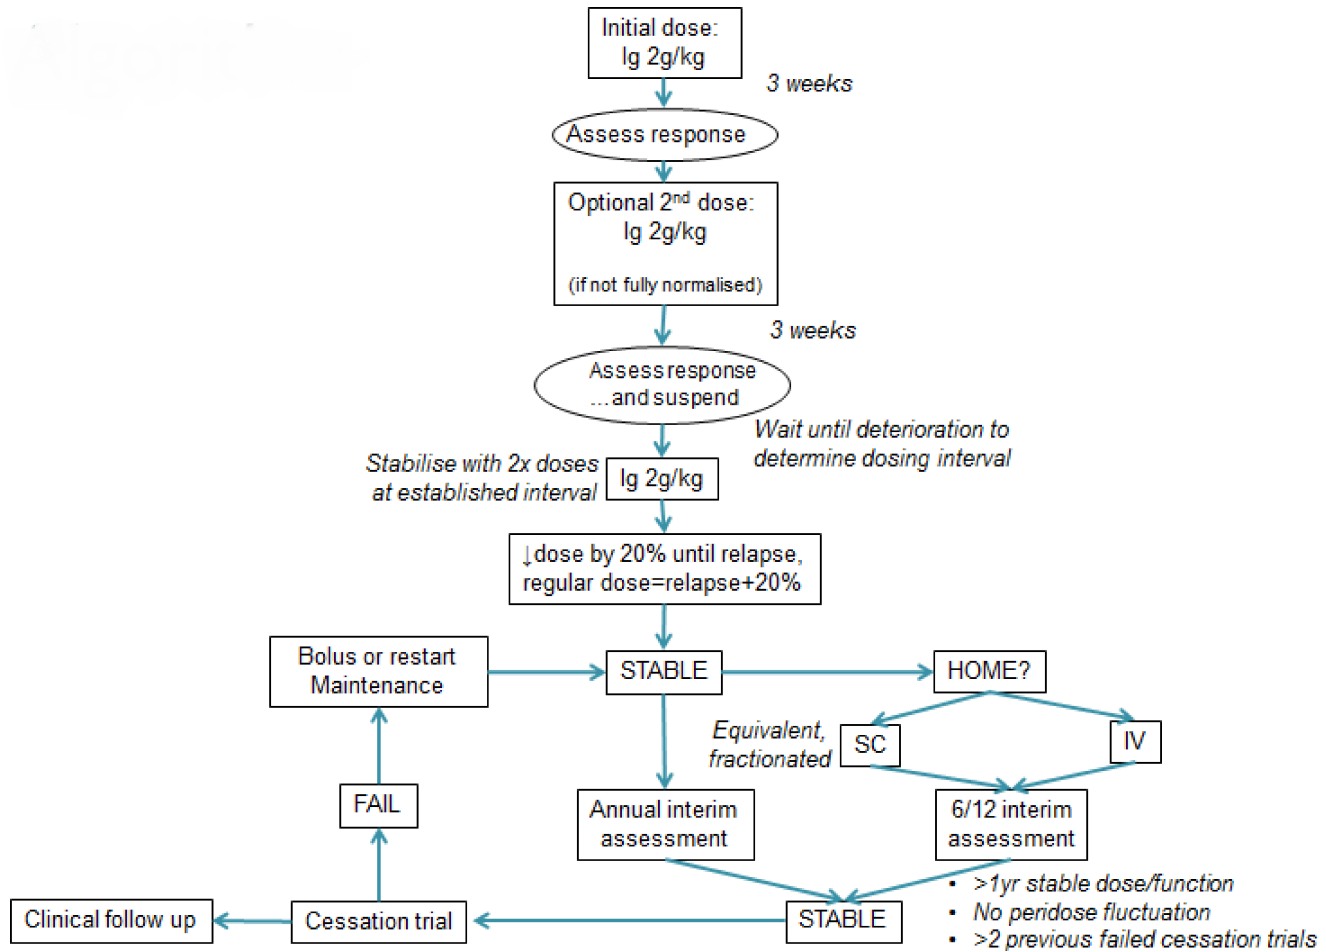

uclh

Lunn et al., J Peripher Nerv Syst. 2016 Mar;21(1):33-7.
